# Supplementary material for: Selective separation of zwitterionic phospholipid homologues with functional ionic liquids as extractants
Source: Royal Society of Chemistry journal article supplement (doi:10.1039/c5ra14202d), 2015-01-01
Supplement: c5ra14202d1.pdf [file c5ra14202d1.pdf]

## SUPPORTING INFORMATION

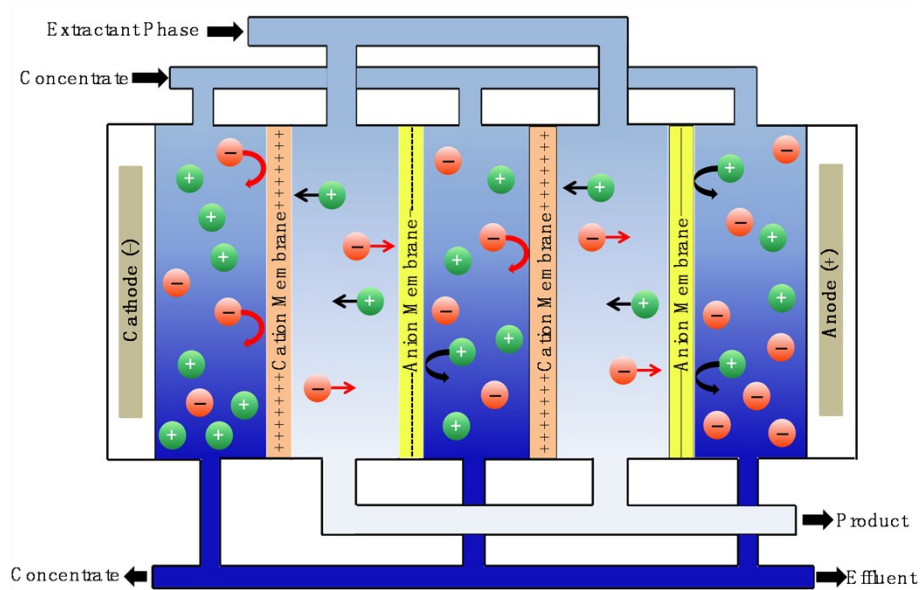

Fig. S1 The principle of electrodialysis.

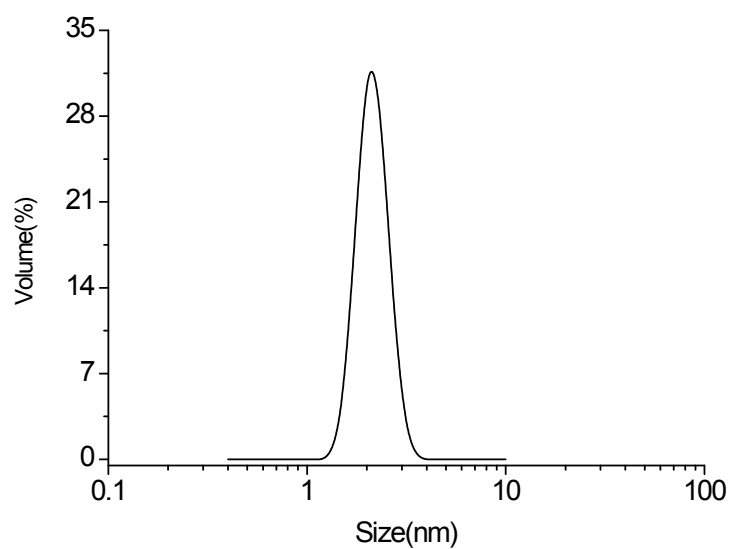

Fig. S2 DLS image of extractant phase of [Ch]Cl-methanol (20/80, mol/mol).
